# Supplementary material for: Parkinson’s Disease and SARS-CoV-2 Infection: Particularities of Molecular and Cellular Mechanisms Regarding Pathogenesis and Treatment
Source: MDPI journal article supplement (doi:10.3390/biomedicines10051000), 2022-04-26
Supplement: s1 [file s1]

|                       |                                                                        |                            |               |
|-----------------------|------------------------------------------------------------------------|----------------------------|---------------|
| <b>Title:</b>         | <b>Parkinson's disease and SARS-CoV2 infection: particularities of</b> |                            |               |
| <b>Start date:</b>    | <b>1.1.21</b>                                                          |                            |               |
| <b>End date:</b>      | <b>31.12.21</b>                                                        |                            |               |
| <b>No of keywords</b> | <b>26</b>                                                              |                            |               |
|                       | <b>Part 1</b>                                                          | <b>Part 2</b>              | <b>Part 3</b> |
| <b>Keywords 1</b>     | SARS-CoV-2                                                             | nanotechnology             | Parkinson     |
| <b>Keywords 2</b>     | SARS-CoV-2                                                             | nanodrugs                  | Parkinson     |
| <b>Keywords 3</b>     | SARS-CoV-2                                                             | nanomaterials              | Parkinson     |
| <b>Keywords 4</b>     | SARS-CoV-2                                                             | Chaperone                  | Parkinson     |
| <b>Keywords 5</b>     | SARS-CoV-2                                                             | Neurodegeneration          | Parkinson     |
| <b>Keywords 6</b>     | SARS-CoV-2                                                             | $\alpha$ -synuclein        | Parkinson     |
| <b>Keywords 7</b>     | SARS-CoV-2                                                             | pathophysiology            | Parkinson     |
| <b>Keywords 8</b>     | SARS-CoV-2                                                             | Genetic Subtypes           | Parkinson     |
| <b>Keywords 9</b>     | SARS-CoV-2                                                             | Neurofilament proteins     | Parkinson     |
| <b>Keywords 10</b>    | SARS-CoV-2                                                             | microglia                  | Parkinson     |
| <b>Keywords 11</b>    | SARS-CoV-2                                                             | misfolded proteins         | Parkinson     |
| <b>Keywords 12</b>    | SARS-CoV-2                                                             | pro-inflammatory mediators | Parkinson     |
| <b>Keywords 13</b>    | Long Covid                                                             | Neuroinflammation          | Parkinson     |
| <b>Keywords 14</b>    | Long Covid                                                             | Neurodegeneration          | Parkinson     |
| <b>Keywords 15</b>    | COVID-19                                                               | nanotechnology             | Parkinson     |
| <b>Keywords 16</b>    | COVID-19                                                               | nanodrugs                  | Parkinson     |
| <b>Keywords 17</b>    | COVID-19                                                               | nanomaterials              | Parkinson     |
| <b>Keywords 18</b>    | COVID-19                                                               | Chaperone                  | Parkinson     |
| <b>Keywords 19</b>    | COVID-19                                                               | Neurodegeneration          | Parkinson     |
| <b>Keywords 20</b>    | COVID-19                                                               | $\alpha$ -synuclein        | Parkinson     |
| <b>Keywords 21</b>    | COVID-19                                                               | pathophysiology            | Parkinson     |
| <b>Keywords 22</b>    | COVID-19                                                               | Genetic Subtypes           | Parkinson     |
| <b>Keywords 23</b>    | COVID-19                                                               | Neurofilament proteins     | Parkinson     |
| <b>Keywords 24</b>    | COVID-19                                                               | microglia                  | Parkinson     |
| <b>Keywords 25</b>    | COVID-19                                                               | misfolded proteins         | Parkinson     |
| <b>Keywords 26</b>    | COVID-19                                                               | pro-inflammatory mediators | Parkinson     |

| Title                                                                                                                                                                                                                                                              | Authors                                                                                                                                                                                                                                                                                                                                                                                                                                                                                                                                                                                                                                                                                                                                                                                                                                                                                                                                                                                                                                                                                                                                                                                                                                                                                                                                                                                                                                                                                                                                                                                                                                                                                                                                                                                                                                                                                                                                                                                                                                                                                                                                                                                                                                                                                                                                                                                                                                                                                                                                                                                                                                                                                                                                                                                                                                                                                                                                                                                                                                                                                                                                                                                                                                                                                                                                                                                                                                                                                                                                                                                                                                                                                                                                                                                                                                                                                                                                                                                                                                                                                                                                                                                                                                                                                                                                                                                                                                                                                                                                                                                                                                                                                                                                                                                                                                                                                                           | Year | Type   | Access                                                                                                                    | PDF                                                                                               | Keywords                                       | No. de citat en la referència |
|--------------------------------------------------------------------------------------------------------------------------------------------------------------------------------------------------------------------------------------------------------------------|-------------------------------------------------------------------------------------------------------------------------------------------------------------------------------------------------------------------------------------------------------------------------------------------------------------------------------------------------------------------------------------------------------------------------------------------------------------------------------------------------------------------------------------------------------------------------------------------------------------------------------------------------------------------------------------------------------------------------------------------------------------------------------------------------------------------------------------------------------------------------------------------------------------------------------------------------------------------------------------------------------------------------------------------------------------------------------------------------------------------------------------------------------------------------------------------------------------------------------------------------------------------------------------------------------------------------------------------------------------------------------------------------------------------------------------------------------------------------------------------------------------------------------------------------------------------------------------------------------------------------------------------------------------------------------------------------------------------------------------------------------------------------------------------------------------------------------------------------------------------------------------------------------------------------------------------------------------------------------------------------------------------------------------------------------------------------------------------------------------------------------------------------------------------------------------------------------------------------------------------------------------------------------------------------------------------------------------------------------------------------------------------------------------------------------------------------------------------------------------------------------------------------------------------------------------------------------------------------------------------------------------------------------------------------------------------------------------------------------------------------------------------------------------------------------------------------------------------------------------------------------------------------------------------------------------------------------------------------------------------------------------------------------------------------------------------------------------------------------------------------------------------------------------------------------------------------------------------------------------------------------------------------------------------------------------------------------------------------------------------------------------------------------------------------------------------------------------------------------------------------------------------------------------------------------------------------------------------------------------------------------------------------------------------------------------------------------------------------------------------------------------------------------------------------------------------------------------------------------------------------------------------------------------------------------------------------------------------------------------------------------------------------------------------------------------------------------------------------------------------------------------------------------------------------------------------------------------------------------------------------------------------------------------------------------------------------------------------------------------------------------------------------------------------------------------------------------------------------------------------------------------------------------------------------------------------------------------------------------------------------------------------------------------------------------------------------------------------------------------------------------------------------------------------------------------------------------------------------------------------------------------------------------------------|------|--------|---------------------------------------------------------------------------------------------------------------------------|---------------------------------------------------------------------------------------------------|------------------------------------------------|-------------------------------|
| COVID-19: dealing with a potential risk factor for chronic neurological disorders.                                                                                                                                                                                 | Schirini T, Landi D, Liguori C                                                                                                                                                                                                                                                                                                                                                                                                                                                                                                                                                                                                                                                                                                                                                                                                                                                                                                                                                                                                                                                                                                                                                                                                                                                                                                                                                                                                                                                                                                                                                                                                                                                                                                                                                                                                                                                                                                                                                                                                                                                                                                                                                                                                                                                                                                                                                                                                                                                                                                                                                                                                                                                                                                                                                                                                                                                                                                                                                                                                                                                                                                                                                                                                                                                                                                                                                                                                                                                                                                                                                                                                                                                                                                                                                                                                                                                                                                                                                                                                                                                                                                                                                                                                                                                                                                                                                                                                                                                                                                                                                                                                                                                                                                                                                                                                                                                                                    | 2020 | Review | Free                                                                                                                      | <a href="https://pubmed.ncbi.nlm.nih.gov/31285258/">https://pubmed.ncbi.nlm.nih.gov/31285258/</a> | "SARS-CoV-2", "Neurodegeneration", "Parkinson" | 24                            |
| Neuroprotective effects of flavone luteolin in neuroinflammation and neurotransmission.                                                                                                                                                                            | Kempuraj D, Sahagavi M, Kempuraj DO, Ahmed MS, et al.                                                                                                                                                                                                                                                                                                                                                                                                                                                                                                                                                                                                                                                                                                                                                                                                                                                                                                                                                                                                                                                                                                                                                                                                                                                                                                                                                                                                                                                                                                                                                                                                                                                                                                                                                                                                                                                                                                                                                                                                                                                                                                                                                                                                                                                                                                                                                                                                                                                                                                                                                                                                                                                                                                                                                                                                                                                                                                                                                                                                                                                                                                                                                                                                                                                                                                                                                                                                                                                                                                                                                                                                                                                                                                                                                                                                                                                                                                                                                                                                                                                                                                                                                                                                                                                                                                                                                                                                                                                                                                                                                                                                                                                                                                                                                                                                                                                             | 2020 | Free   | <a href="https://pubmed.ncbi.nlm.nih.gov/31095858/">https://pubmed.ncbi.nlm.nih.gov/31095858/</a>                         | "SARS-CoV-2", "Neurodegeneration", "Parkinson"                                                    | 22                                             |                               |
| Pathophysiological clues to how the Emergent SARS-CoV-2 Can Potentially Injure Microglia.                                                                                                                                                                          | Dattaraj N, Sankaranarayanan V, Kulkarni A, Abhinav ET, et al.                                                                                                                                                                                                                                                                                                                                                                                                                                                                                                                                                                                                                                                                                                                                                                                                                                                                                                                                                                                                                                                                                                                                                                                                                                                                                                                                                                                                                                                                                                                                                                                                                                                                                                                                                                                                                                                                                                                                                                                                                                                                                                                                                                                                                                                                                                                                                                                                                                                                                                                                                                                                                                                                                                                                                                                                                                                                                                                                                                                                                                                                                                                                                                                                                                                                                                                                                                                                                                                                                                                                                                                                                                                                                                                                                                                                                                                                                                                                                                                                                                                                                                                                                                                                                                                                                                                                                                                                                                                                                                                                                                                                                                                                                                                                                                                                                                                    | 2020 | Free   | <a href="https://pubmed.ncbi.nlm.nih.gov/31147221/">https://pubmed.ncbi.nlm.nih.gov/31147221/</a>                         | "SARS-CoV-2", "Neurodegeneration", "Parkinson"                                                    | 21                                             |                               |
| The Intersection of Parkinson's Disease, Viral Infections, and COVID-19.                                                                                                                                                                                           | Rosen B, Kurishi A, Vasquez-Jimenez GA, Miller SG                                                                                                                                                                                                                                                                                                                                                                                                                                                                                                                                                                                                                                                                                                                                                                                                                                                                                                                                                                                                                                                                                                                                                                                                                                                                                                                                                                                                                                                                                                                                                                                                                                                                                                                                                                                                                                                                                                                                                                                                                                                                                                                                                                                                                                                                                                                                                                                                                                                                                                                                                                                                                                                                                                                                                                                                                                                                                                                                                                                                                                                                                                                                                                                                                                                                                                                                                                                                                                                                                                                                                                                                                                                                                                                                                                                                                                                                                                                                                                                                                                                                                                                                                                                                                                                                                                                                                                                                                                                                                                                                                                                                                                                                                                                                                                                                                                                                 | 2020 | Free   | <a href="https://pubmed.ncbi.nlm.nih.gov/31061306/">https://pubmed.ncbi.nlm.nih.gov/31061306/</a>                         | "SARS-CoV-2", "Neurodegeneration", "Parkinson"                                                    | 4                                              |                               |
| Alzheimer's and Parkinson's Diseases Predict Different COVID-19 Outcomes: A UK Biobank Study.                                                                                                                                                                      | Yi Y, Traxler M, Popovic B, Lee ML, Martins LM                                                                                                                                                                                                                                                                                                                                                                                                                                                                                                                                                                                                                                                                                                                                                                                                                                                                                                                                                                                                                                                                                                                                                                                                                                                                                                                                                                                                                                                                                                                                                                                                                                                                                                                                                                                                                                                                                                                                                                                                                                                                                                                                                                                                                                                                                                                                                                                                                                                                                                                                                                                                                                                                                                                                                                                                                                                                                                                                                                                                                                                                                                                                                                                                                                                                                                                                                                                                                                                                                                                                                                                                                                                                                                                                                                                                                                                                                                                                                                                                                                                                                                                                                                                                                                                                                                                                                                                                                                                                                                                                                                                                                                                                                                                                                                                                                                                                    | 2020 | Free   | <a href="https://pubmed.ncbi.nlm.nih.gov/31033037/">https://pubmed.ncbi.nlm.nih.gov/31033037/</a>                         | "SARS-CoV-2", "Neurodegeneration", "Parkinson"                                                    | 25                                             |                               |
| Clinical Profiles and Mortality of COVID-19 Inpatients with Parkinson's Disease in Guangzhou, China.                                                                                                                                                               | Scherbaum R, Kwong H, Leung D, Bertha D, Gold R, Kong W                                                                                                                                                                                                                                                                                                                                                                                                                                                                                                                                                                                                                                                                                                                                                                                                                                                                                                                                                                                                                                                                                                                                                                                                                                                                                                                                                                                                                                                                                                                                                                                                                                                                                                                                                                                                                                                                                                                                                                                                                                                                                                                                                                                                                                                                                                                                                                                                                                                                                                                                                                                                                                                                                                                                                                                                                                                                                                                                                                                                                                                                                                                                                                                                                                                                                                                                                                                                                                                                                                                                                                                                                                                                                                                                                                                                                                                                                                                                                                                                                                                                                                                                                                                                                                                                                                                                                                                                                                                                                                                                                                                                                                                                                                                                                                                                                                                           | 2020 | Free   | <a href="https://pubmed.ncbi.nlm.nih.gov/310942924/">https://pubmed.ncbi.nlm.nih.gov/310942924/</a>                       | "SARS-CoV-2", "Neurodegeneration", "Parkinson"                                                    | 13                                             |                               |
| Vitamin D supplementation and outcomes in coronavirus disease 2019 (COVID-19): The Intracellular Interleukin-6 signaling system: Friend or foe. Some light from the downy side of astroglial toll-like receptors (TLRs) in central nervous system injuries, injury | Labadura-Cerdá J, Valenzuela R, Costa-Besada MA, Díaz I, Acoglu C, Heary RP, Eklakes S                                                                                                                                                                                                                                                                                                                                                                                                                                                                                                                                                                                                                                                                                                                                                                                                                                                                                                                                                                                                                                                                                                                                                                                                                                                                                                                                                                                                                                                                                                                                                                                                                                                                                                                                                                                                                                                                                                                                                                                                                                                                                                                                                                                                                                                                                                                                                                                                                                                                                                                                                                                                                                                                                                                                                                                                                                                                                                                                                                                                                                                                                                                                                                                                                                                                                                                                                                                                                                                                                                                                                                                                                                                                                                                                                                                                                                                                                                                                                                                                                                                                                                                                                                                                                                                                                                                                                                                                                                                                                                                                                                                                                                                                                                                                                                                                                            | 2020 | Free   | <a href="https://pubmed.ncbi.nlm.nih.gov/31033660/">https://pubmed.ncbi.nlm.nih.gov/31033660/</a>                         | "SARS-CoV-2", "microglia", "Parkinson", "astrocyte"                                               | 4                                              |                               |
| Nanotechnology advances in pathogen- and host-targeted antiviral delivery systems.                                                                                                                                                                                 | Fernández-Pérez, Jacinto Morero, Marcel Torres, Bachy Delly Transl F                                                                                                                                                                                                                                                                                                                                                                                                                                                                                                                                                                                                                                                                                                                                                                                                                                                                                                                                                                                                                                                                                                                                                                                                                                                                                                                                                                                                                                                                                                                                                                                                                                                                                                                                                                                                                                                                                                                                                                                                                                                                                                                                                                                                                                                                                                                                                                                                                                                                                                                                                                                                                                                                                                                                                                                                                                                                                                                                                                                                                                                                                                                                                                                                                                                                                                                                                                                                                                                                                                                                                                                                                                                                                                                                                                                                                                                                                                                                                                                                                                                                                                                                                                                                                                                                                                                                                                                                                                                                                                                                                                                                                                                                                                                                                                                                                                              | 2020 | Free   | <a href="https://www.ncbi.nlm.nih.gov/pmc/articles/PMC799507/">https://www.ncbi.nlm.nih.gov/pmc/articles/PMC799507/</a>   | "SARS-CoV-2", "nanotechnology", "Parkinson"                                                       | 8                                              |                               |
| Applications of nanotechnology in virus detection, tracking, and infection mechanism.                                                                                                                                                                              | Jun Kan, Anveta Thapa, Hanjie Wan, Jin Chang                                                                                                                                                                                                                                                                                                                                                                                                                                                                                                                                                                                                                                                                                                                                                                                                                                                                                                                                                                                                                                                                                                                                                                                                                                                                                                                                                                                                                                                                                                                                                                                                                                                                                                                                                                                                                                                                                                                                                                                                                                                                                                                                                                                                                                                                                                                                                                                                                                                                                                                                                                                                                                                                                                                                                                                                                                                                                                                                                                                                                                                                                                                                                                                                                                                                                                                                                                                                                                                                                                                                                                                                                                                                                                                                                                                                                                                                                                                                                                                                                                                                                                                                                                                                                                                                                                                                                                                                                                                                                                                                                                                                                                                                                                                                                                                                                                                                      | 2020 | Free   | <a href="https://www.ncbi.nlm.nih.gov/pmc/articles/PMC7995016/">https://www.ncbi.nlm.nih.gov/pmc/articles/PMC7995016/</a> | "SARS-CoV-2", "nanotechnology", "Parkinson"                                                       | 4                                              |                               |
| Nanomaterials for the Diagnosis and Treatment of Urinary Tract Infections.                                                                                                                                                                                         | Mahmood Ahmad, Mahmood Parwez, Abbas Rahdar, Riya                                                                                                                                                                                                                                                                                                                                                                                                                                                                                                                                                                                                                                                                                                                                                                                                                                                                                                                                                                                                                                                                                                                                                                                                                                                                                                                                                                                                                                                                                                                                                                                                                                                                                                                                                                                                                                                                                                                                                                                                                                                                                                                                                                                                                                                                                                                                                                                                                                                                                                                                                                                                                                                                                                                                                                                                                                                                                                                                                                                                                                                                                                                                                                                                                                                                                                                                                                                                                                                                                                                                                                                                                                                                                                                                                                                                                                                                                                                                                                                                                                                                                                                                                                                                                                                                                                                                                                                                                                                                                                                                                                                                                                                                                                                                                                                                                                                                 | 2020 | Free   | <a href="https://www.ncbi.nlm.nih.gov/pmc/articles/PMC793670/">https://www.ncbi.nlm.nih.gov/pmc/articles/PMC793670/</a>   | "SARS-CoV-2", "nanotechnology", "Parkinson"                                                       | 16                                             |                               |
| Probiotics, Photobiomodulation, and Disease Management: Controversies and Challenges.                                                                                                                                                                              | Laura Marinella Alfalco, Gerhard Uhlrich                                                                                                                                                                                                                                                                                                                                                                                                                                                                                                                                                                                                                                                                                                                                                                                                                                                                                                                                                                                                                                                                                                                                                                                                                                                                                                                                                                                                                                                                                                                                                                                                                                                                                                                                                                                                                                                                                                                                                                                                                                                                                                                                                                                                                                                                                                                                                                                                                                                                                                                                                                                                                                                                                                                                                                                                                                                                                                                                                                                                                                                                                                                                                                                                                                                                                                                                                                                                                                                                                                                                                                                                                                                                                                                                                                                                                                                                                                                                                                                                                                                                                                                                                                                                                                                                                                                                                                                                                                                                                                                                                                                                                                                                                                                                                                                                                                                                          | 2020 | Free   | <a href="https://www.ncbi.nlm.nih.gov/pmc/articles/PMC7934884/">https://www.ncbi.nlm.nih.gov/pmc/articles/PMC7934884/</a> | "SARS-CoV-2", "nanotechnology", "Parkinson"                                                       | 9                                              |                               |
| Nanomaterials for the Diagnosis and Treatment of Inflammatory Arthritis.                                                                                                                                                                                           | Sayedeh Marjane Hosseini-Nasab, Mahmood Parwez, Abbas                                                                                                                                                                                                                                                                                                                                                                                                                                                                                                                                                                                                                                                                                                                                                                                                                                                                                                                                                                                                                                                                                                                                                                                                                                                                                                                                                                                                                                                                                                                                                                                                                                                                                                                                                                                                                                                                                                                                                                                                                                                                                                                                                                                                                                                                                                                                                                                                                                                                                                                                                                                                                                                                                                                                                                                                                                                                                                                                                                                                                                                                                                                                                                                                                                                                                                                                                                                                                                                                                                                                                                                                                                                                                                                                                                                                                                                                                                                                                                                                                                                                                                                                                                                                                                                                                                                                                                                                                                                                                                                                                                                                                                                                                                                                                                                                                                                             | 2020 | Free   | <a href="https://www.ncbi.nlm.nih.gov/pmc/articles/PMC7934884/">https://www.ncbi.nlm.nih.gov/pmc/articles/PMC7934884/</a> | "SARS-CoV-2", "nanotechnology", "Parkinson"                                                       | 8                                              |                               |
| Biochemical, Ameliorative and Cytotoxic Effects of Novel Synthesized Curcumin Microparticles.                                                                                                                                                                      | Abbas Rahdar, Mahmood Reza Hajmohamed, Saman Salari                                                                                                                                                                                                                                                                                                                                                                                                                                                                                                                                                                                                                                                                                                                                                                                                                                                                                                                                                                                                                                                                                                                                                                                                                                                                                                                                                                                                                                                                                                                                                                                                                                                                                                                                                                                                                                                                                                                                                                                                                                                                                                                                                                                                                                                                                                                                                                                                                                                                                                                                                                                                                                                                                                                                                                                                                                                                                                                                                                                                                                                                                                                                                                                                                                                                                                                                                                                                                                                                                                                                                                                                                                                                                                                                                                                                                                                                                                                                                                                                                                                                                                                                                                                                                                                                                                                                                                                                                                                                                                                                                                                                                                                                                                                                                                                                                                                               | 2020 | Free   | <a href="https://www.ncbi.nlm.nih.gov/pmc/articles/PMC7934884/">https://www.ncbi.nlm.nih.gov/pmc/articles/PMC7934884/</a> | "SARS-CoV-2", "nanotechnology", "Parkinson"                                                       | 17                                             |                               |
| Integrated network analysis reveals new genes suggesting COVID-19 chronic effects.                                                                                                                                                                                 | Alexis Pavel, Giusy del Giudice, Antonio Federico, Brian Liu, Qian Julia Tang                                                                                                                                                                                                                                                                                                                                                                                                                                                                                                                                                                                                                                                                                                                                                                                                                                                                                                                                                                                                                                                                                                                                                                                                                                                                                                                                                                                                                                                                                                                                                                                                                                                                                                                                                                                                                                                                                                                                                                                                                                                                                                                                                                                                                                                                                                                                                                                                                                                                                                                                                                                                                                                                                                                                                                                                                                                                                                                                                                                                                                                                                                                                                                                                                                                                                                                                                                                                                                                                                                                                                                                                                                                                                                                                                                                                                                                                                                                                                                                                                                                                                                                                                                                                                                                                                                                                                                                                                                                                                                                                                                                                                                                                                                                                                                                                                                     | 2020 | Free   | <a href="https://www.ncbi.nlm.nih.gov/pmc/articles/PMC7885494/">https://www.ncbi.nlm.nih.gov/pmc/articles/PMC7885494/</a> | "SARS-CoV-2", "nanomaterials", "Parkinson"                                                        | 6                                              |                               |
| Human PISC-Based Modeling of Central Nervous System Disorders for Drug Discovery.                                                                                                                                                                                  | Claudia Feja, Davide Carraro, Gian Nicola Accardi, Vittorio                                                                                                                                                                                                                                                                                                                                                                                                                                                                                                                                                                                                                                                                                                                                                                                                                                                                                                                                                                                                                                                                                                                                                                                                                                                                                                                                                                                                                                                                                                                                                                                                                                                                                                                                                                                                                                                                                                                                                                                                                                                                                                                                                                                                                                                                                                                                                                                                                                                                                                                                                                                                                                                                                                                                                                                                                                                                                                                                                                                                                                                                                                                                                                                                                                                                                                                                                                                                                                                                                                                                                                                                                                                                                                                                                                                                                                                                                                                                                                                                                                                                                                                                                                                                                                                                                                                                                                                                                                                                                                                                                                                                                                                                                                                                                                                                                                                       | 2020 | Free   | <a href="https://www.ncbi.nlm.nih.gov/pmc/articles/PMC7885494/">https://www.ncbi.nlm.nih.gov/pmc/articles/PMC7885494/</a> | "SARS-CoV-2", "nanomaterials", "Parkinson"                                                        | 7                                              |                               |
| Evolving Rapid Response Tools for Brain-on-Chip Technologies.                                                                                                                                                                                                      | Kylea Felt, Brian Anagnostou, Ying Zhenzhang Zhang, Paul                                                                                                                                                                                                                                                                                                                                                                                                                                                                                                                                                                                                                                                                                                                                                                                                                                                                                                                                                                                                                                                                                                                                                                                                                                                                                                                                                                                                                                                                                                                                                                                                                                                                                                                                                                                                                                                                                                                                                                                                                                                                                                                                                                                                                                                                                                                                                                                                                                                                                                                                                                                                                                                                                                                                                                                                                                                                                                                                                                                                                                                                                                                                                                                                                                                                                                                                                                                                                                                                                                                                                                                                                                                                                                                                                                                                                                                                                                                                                                                                                                                                                                                                                                                                                                                                                                                                                                                                                                                                                                                                                                                                                                                                                                                                                                                                                                                          | 2020 | Free   | <a href="https://www.ncbi.nlm.nih.gov/pmc/articles/PMC7885494/">https://www.ncbi.nlm.nih.gov/pmc/articles/PMC7885494/</a> | "SARS-CoV-2", "nanomaterials", "Parkinson"                                                        | 10                                             |                               |
| Functions of ROS in Macrophages and Antimicrobial Immunity.                                                                                                                                                                                                        | Marcel Herberich, Michael Schramm                                                                                                                                                                                                                                                                                                                                                                                                                                                                                                                                                                                                                                                                                                                                                                                                                                                                                                                                                                                                                                                                                                                                                                                                                                                                                                                                                                                                                                                                                                                                                                                                                                                                                                                                                                                                                                                                                                                                                                                                                                                                                                                                                                                                                                                                                                                                                                                                                                                                                                                                                                                                                                                                                                                                                                                                                                                                                                                                                                                                                                                                                                                                                                                                                                                                                                                                                                                                                                                                                                                                                                                                                                                                                                                                                                                                                                                                                                                                                                                                                                                                                                                                                                                                                                                                                                                                                                                                                                                                                                                                                                                                                                                                                                                                                                                                                                                                                 | 2020 | Free   | <a href="https://www.ncbi.nlm.nih.gov/pmc/articles/PMC7885494/">https://www.ncbi.nlm.nih.gov/pmc/articles/PMC7885494/</a> | "SARS-CoV-2", "nanomaterials", "Parkinson"                                                        | 30                                             |                               |
| Therapeutic Potential of Exfoliating Autophagy Cascade Against Coronavirus Infection.                                                                                                                                                                              | Sabbaji Mahesh, Abhishek Singh                                                                                                                                                                                                                                                                                                                                                                                                                                                                                                                                                                                                                                                                                                                                                                                                                                                                                                                                                                                                                                                                                                                                                                                                                                                                                                                                                                                                                                                                                                                                                                                                                                                                                                                                                                                                                                                                                                                                                                                                                                                                                                                                                                                                                                                                                                                                                                                                                                                                                                                                                                                                                                                                                                                                                                                                                                                                                                                                                                                                                                                                                                                                                                                                                                                                                                                                                                                                                                                                                                                                                                                                                                                                                                                                                                                                                                                                                                                                                                                                                                                                                                                                                                                                                                                                                                                                                                                                                                                                                                                                                                                                                                                                                                                                                                                                                                                                                    | 2020 | Free   | <a href="https://www.ncbi.nlm.nih.gov/pmc/articles/PMC7885494/">https://www.ncbi.nlm.nih.gov/pmc/articles/PMC7885494/</a> | "SARS-CoV-2", "Chaperone", "Parkinson"                                                            | 4                                              |                               |
| Alpha-synuclein research: strategic moves in the battle against Parkinson's disease.                                                                                                                                                                               | David Klionsky, Giulia Petroni, Rajni K Amarawati, Eric                                                                                                                                                                                                                                                                                                                                                                                                                                                                                                                                                                                                                                                                                                                                                                                                                                                                                                                                                                                                                                                                                                                                                                                                                                                                                                                                                                                                                                                                                                                                                                                                                                                                                                                                                                                                                                                                                                                                                                                                                                                                                                                                                                                                                                                                                                                                                                                                                                                                                                                                                                                                                                                                                                                                                                                                                                                                                                                                                                                                                                                                                                                                                                                                                                                                                                                                                                                                                                                                                                                                                                                                                                                                                                                                                                                                                                                                                                                                                                                                                                                                                                                                                                                                                                                                                                                                                                                                                                                                                                                                                                                                                                                                                                                                                                                                                                                           | 2020 | Free   | <a href="https://www.ncbi.nlm.nih.gov/pmc/articles/PMC7885494/">https://www.ncbi.nlm.nih.gov/pmc/articles/PMC7885494/</a> | "SARS-CoV-2", "Chaperone", "Parkinson"                                                            | 20                                             |                               |
| Machinery, regulation and pathological implications of autophagosome maturation.                                                                                                                                                                                   | Yang G, Zhao, Patrick Condorelli, Hong Zhang                                                                                                                                                                                                                                                                                                                                                                                                                                                                                                                                                                                                                                                                                                                                                                                                                                                                                                                                                                                                                                                                                                                                                                                                                                                                                                                                                                                                                                                                                                                                                                                                                                                                                                                                                                                                                                                                                                                                                                                                                                                                                                                                                                                                                                                                                                                                                                                                                                                                                                                                                                                                                                                                                                                                                                                                                                                                                                                                                                                                                                                                                                                                                                                                                                                                                                                                                                                                                                                                                                                                                                                                                                                                                                                                                                                                                                                                                                                                                                                                                                                                                                                                                                                                                                                                                                                                                                                                                                                                                                                                                                                                                                                                                                                                                                                                                                                                      | 2020 | Free   | <a href="https://www.ncbi.nlm.nih.gov/pmc/articles/PMC7885494/">https://www.ncbi.nlm.nih.gov/pmc/articles/PMC7885494/</a> | "SARS-CoV-2", "Chaperone", "Parkinson"                                                            | 15                                             |                               |
| Diversity and versatility of alpha-syn signalling in health and disease.                                                                                                                                                                                           | Rafaela Conces, Angel E. Nebreda                                                                                                                                                                                                                                                                                                                                                                                                                                                                                                                                                                                                                                                                                                                                                                                                                                                                                                                                                                                                                                                                                                                                                                                                                                                                                                                                                                                                                                                                                                                                                                                                                                                                                                                                                                                                                                                                                                                                                                                                                                                                                                                                                                                                                                                                                                                                                                                                                                                                                                                                                                                                                                                                                                                                                                                                                                                                                                                                                                                                                                                                                                                                                                                                                                                                                                                                                                                                                                                                                                                                                                                                                                                                                                                                                                                                                                                                                                                                                                                                                                                                                                                                                                                                                                                                                                                                                                                                                                                                                                                                                                                                                                                                                                                                                                                                                                                                                  | 2020 | Free   | <a href="https://www.ncbi.nlm.nih.gov/pmc/articles/PMC7885494/">https://www.ncbi.nlm.nih.gov/pmc/articles/PMC7885494/</a> | "SARS-CoV-2", "Chaperone", "Parkinson"                                                            | 9                                              |                               |
| Human Parasitosis X (PDX): Protein Functions and Molecular Mechanisms.                                                                                                                                                                                             | Giacopo Mancini, Elena Porzio, Teresa Nicolò, Carla Crivello                                                                                                                                                                                                                                                                                                                                                                                                                                                                                                                                                                                                                                                                                                                                                                                                                                                                                                                                                                                                                                                                                                                                                                                                                                                                                                                                                                                                                                                                                                                                                                                                                                                                                                                                                                                                                                                                                                                                                                                                                                                                                                                                                                                                                                                                                                                                                                                                                                                                                                                                                                                                                                                                                                                                                                                                                                                                                                                                                                                                                                                                                                                                                                                                                                                                                                                                                                                                                                                                                                                                                                                                                                                                                                                                                                                                                                                                                                                                                                                                                                                                                                                                                                                                                                                                                                                                                                                                                                                                                                                                                                                                                                                                                                                                                                                                                                                      | 2020 | Free   | <a href="https://www.ncbi.nlm.nih.gov/pmc/articles/PMC7885494/">https://www.ncbi.nlm.nih.gov/pmc/articles/PMC7885494/</a> | "SARS-CoV-2", "Chaperone", "Parkinson"                                                            | 9                                              |                               |
| Supervised Machine Learning Review of Prognostic Human Uses.                                                                                                                                                                                                       | Arjun Kumar, Arjun Kumar, Arjun Kumar, Arjun Kumar                                                                                                                                                                                                                                                                                                                                                                                                                                                                                                                                                                                                                                                                                                                                                                                                                                                                                                                                                                                                                                                                                                                                                                                                                                                                                                                                                                                                                                                                                                                                                                                                                                                                                                                                                                                                                                                                                                                                                                                                                                                                                                                                                                                                                                                                                                                                                                                                                                                                                                                                                                                                                                                                                                                                                                                                                                                                                                                                                                                                                                                                                                                                                                                                                                                                                                                                                                                                                                                                                                                                                                                                                                                                                                                                                                                                                                                                                                                                                                                                                                                                                                                                                                                                                                                                                                                                                                                                                                                                                                                                                                                                                                                                                                                                                                                                                                                                | 2020 | Free   | <a href="https://www.ncbi.nlm.nih.gov/pmc/articles/PMC7885494/">https://www.ncbi.nlm.nih.gov/pmc/articles/PMC7885494/</a> | "SARS-CoV-2", "Chaperone", "Parkinson"                                                            | 9                                              |                               |
| The Endothelium is both a Target and a Barrier of HDL's Protective Functions.                                                                                                                                                                                      | Jérôme Robert, Elton Ostro, Arnold von Eckardstein                                                                                                                                                                                                                                                                                                                                                                                                                                                                                                                                                                                                                                                                                                                                                                                                                                                                                                                                                                                                                                                                                                                                                                                                                                                                                                                                                                                                                                                                                                                                                                                                                                                                                                                                                                                                                                                                                                                                                                                                                                                                                                                                                                                                                                                                                                                                                                                                                                                                                                                                                                                                                                                                                                                                                                                                                                                                                                                                                                                                                                                                                                                                                                                                                                                                                                                                                                                                                                                                                                                                                                                                                                                                                                                                                                                                                                                                                                                                                                                                                                                                                                                                                                                                                                                                                                                                                                                                                                                                                                                                                                                                                                                                                                                                                                                                                                                                | 2020 | Free   | <a href="https://www.ncbi.nlm.nih.gov/pmc/articles/PMC7885494/">https://www.ncbi.nlm.nih.gov/pmc/articles/PMC7885494/</a> | "SARS-CoV-2", "Chaperone", "Parkinson"                                                            | 6                                              |                               |
| Atypical p38 Signaling, Activation, and Implications for Parkinson's Disease.                                                                                                                                                                                      | Jerome C. Blum, Anita Antonino, Jennifer Okamoto                                                                                                                                                                                                                                                                                                                                                                                                                                                                                                                                                                                                                                                                                                                                                                                                                                                                                                                                                                                                                                                                                                                                                                                                                                                                                                                                                                                                                                                                                                                                                                                                                                                                                                                                                                                                                                                                                                                                                                                                                                                                                                                                                                                                                                                                                                                                                                                                                                                                                                                                                                                                                                                                                                                                                                                                                                                                                                                                                                                                                                                                                                                                                                                                                                                                                                                                                                                                                                                                                                                                                                                                                                                                                                                                                                                                                                                                                                                                                                                                                                                                                                                                                                                                                                                                                                                                                                                                                                                                                                                                                                                                                                                                                                                                                                                                                                                                  | 2020 | Free   | <a href="https://www.ncbi.nlm.nih.gov/pmc/articles/PMC7885494/">https://www.ncbi.nlm.nih.gov/pmc/articles/PMC7885494/</a> | "SARS-CoV-2", "Chaperone", "Parkinson"                                                            | 6                                              |                               |
| Alzheimer's Disease Pathogenesis: Role of Autophagy and Mitochondrial Focusing in Mitochondrial Dysfunction.                                                                                                                                                       | Medhi Elachrafi, Ali Alsharif, Ali Alsharif, Ali Alsharif                                                                                                                                                                                                                                                                                                                                                                                                                                                                                                                                                                                                                                                                                                                                                                                                                                                                                                                                                                                                                                                                                                                                                                                                                                                                                                                                                                                                                                                                                                                                                                                                                                                                                                                                                                                                                                                                                                                                                                                                                                                                                                                                                                                                                                                                                                                                                                                                                                                                                                                                                                                                                                                                                                                                                                                                                                                                                                                                                                                                                                                                                                                                                                                                                                                                                                                                                                                                                                                                                                                                                                                                                                                                                                                                                                                                                                                                                                                                                                                                                                                                                                                                                                                                                                                                                                                                                                                                                                                                                                                                                                                                                                                                                                                                                                                                                                                         | 2020 | Free   | <a href="https://www.ncbi.nlm.nih.gov/pmc/articles/PMC7885494/">https://www.ncbi.nlm.nih.gov/pmc/articles/PMC7885494/</a> | "SARS-CoV-2", "Chaperone", "Parkinson"                                                            | 21                                             |                               |
| Microglial Implications in SARS-CoV-2 Infection and COVID-19: Lessons From Animal Models.                                                                                                                                                                          | Mehtab A. Awad, Benjamin B. Smith, Amir Babutunde                                                                                                                                                                                                                                                                                                                                                                                                                                                                                                                                                                                                                                                                                                                                                                                                                                                                                                                                                                                                                                                                                                                                                                                                                                                                                                                                                                                                                                                                                                                                                                                                                                                                                                                                                                                                                                                                                                                                                                                                                                                                                                                                                                                                                                                                                                                                                                                                                                                                                                                                                                                                                                                                                                                                                                                                                                                                                                                                                                                                                                                                                                                                                                                                                                                                                                                                                                                                                                                                                                                                                                                                                                                                                                                                                                                                                                                                                                                                                                                                                                                                                                                                                                                                                                                                                                                                                                                                                                                                                                                                                                                                                                                                                                                                                                                                                                                                 | 2020 | Free   | <a href="https://www.ncbi.nlm.nih.gov/pmc/articles/PMC7885494/">https://www.ncbi.nlm.nih.gov/pmc/articles/PMC7885494/</a> | "SARS-CoV-2", "Neurodegeneration", "Parkinson"                                                    | 6                                              |                               |
| Elucidating the Neurophysiological Mechanisms of SARS-CoV-2 Infection.                                                                                                                                                                                             | Paco Pacheco-Herrera, Luis O. Solís-Rojas, Charles R. Har                                                                                                                                                                                                                                                                                                                                                                                                                                                                                                                                                                                                                                                                                                                                                                                                                                                                                                                                                                                                                                                                                                                                                                                                                                                                                                                                                                                                                                                                                                                                                                                                                                                                                                                                                                                                                                                                                                                                                                                                                                                                                                                                                                                                                                                                                                                                                                                                                                                                                                                                                                                                                                                                                                                                                                                                                                                                                                                                                                                                                                                                                                                                                                                                                                                                                                                                                                                                                                                                                                                                                                                                                                                                                                                                                                                                                                                                                                                                                                                                                                                                                                                                                                                                                                                                                                                                                                                                                                                                                                                                                                                                                                                                                                                                                                                                                                                         | 2020 | Free   | <a href="https://www.ncbi.nlm.nih.gov/pmc/articles/PMC7885494/">https://www.ncbi.nlm.nih.gov/pmc/articles/PMC7885494/</a> | "SARS-CoV-2", "Neurodegeneration", "Parkinson"                                                    | 12                                             |                               |
| Regulating the Neurological Manifestations of Coronavirus by Cardiac Physicochemical Parameters.                                                                                                                                                                   | Sajid Hafiz, Sanjay Pillai, Mohammad Bagher Majidi                                                                                                                                                                                                                                                                                                                                                                                                                                                                                                                                                                                                                                                                                                                                                                                                                                                                                                                                                                                                                                                                                                                                                                                                                                                                                                                                                                                                                                                                                                                                                                                                                                                                                                                                                                                                                                                                                                                                                                                                                                                                                                                                                                                                                                                                                                                                                                                                                                                                                                                                                                                                                                                                                                                                                                                                                                                                                                                                                                                                                                                                                                                                                                                                                                                                                                                                                                                                                                                                                                                                                                                                                                                                                                                                                                                                                                                                                                                                                                                                                                                                                                                                                                                                                                                                                                                                                                                                                                                                                                                                                                                                                                                                                                                                                                                                                                                                | 2020 | Free   | <a href="https://www.ncbi.nlm.nih.gov/pmc/articles/PMC7885494/">https://www.ncbi.nlm.nih.gov/pmc/articles/PMC7885494/</a> | "SARS-CoV-2", "Neurodegeneration", "Parkinson"                                                    | 5                                              |                               |
| Parkinson's Disease and the COVID-19 Pandemic.                                                                                                                                                                                                                     | Conor Ferriter, Alfonso Fares                                                                                                                                                                                                                                                                                                                                                                                                                                                                                                                                                                                                                                                                                                                                                                                                                                                                                                                                                                                                                                                                                                                                                                                                                                                                                                                                                                                                                                                                                                                                                                                                                                                                                                                                                                                                                                                                                                                                                                                                                                                                                                                                                                                                                                                                                                                                                                                                                                                                                                                                                                                                                                                                                                                                                                                                                                                                                                                                                                                                                                                                                                                                                                                                                                                                                                                                                                                                                                                                                                                                                                                                                                                                                                                                                                                                                                                                                                                                                                                                                                                                                                                                                                                                                                                                                                                                                                                                                                                                                                                                                                                                                                                                                                                                                                                                                                                                                     | 2020 | Free   | <a href="https://www.ncbi.nlm.nih.gov/pmc/articles/PMC7885494/">https://www.ncbi.nlm.nih.gov/pmc/articles/PMC7885494/</a> | "SARS-CoV-2", "Neurodegeneration", "Parkinson"                                                    | 13                                             |                               |
| The Immunopathogenesis of Neuroinvasive Lesions of SARS-CoV-2 Infection in COVID-19.                                                                                                                                                                               | Shamila D. Allagar, Emma Mortaz, Mohammad Varshni                                                                                                                                                                                                                                                                                                                                                                                                                                                                                                                                                                                                                                                                                                                                                                                                                                                                                                                                                                                                                                                                                                                                                                                                                                                                                                                                                                                                                                                                                                                                                                                                                                                                                                                                                                                                                                                                                                                                                                                                                                                                                                                                                                                                                                                                                                                                                                                                                                                                                                                                                                                                                                                                                                                                                                                                                                                                                                                                                                                                                                                                                                                                                                                                                                                                                                                                                                                                                                                                                                                                                                                                                                                                                                                                                                                                                                                                                                                                                                                                                                                                                                                                                                                                                                                                                                                                                                                                                                                                                                                                                                                                                                                                                                                                                                                                                                                                 | 2020 | Free   | <a href="https://www.ncbi.nlm.nih.gov/pmc/articles/PMC7885494/">https://www.ncbi.nlm.nih.gov/pmc/articles/PMC7885494/</a> | "SARS-CoV-2", "Neurodegeneration", "Parkinson"                                                    | 6                                              |                               |
| Immune-mediated myositis and pathogenesis of COVID-19-associated neurological complications.                                                                                                                                                                       | Harish Chandra, Amita Singh, Abdul Karim, Binayak                                                                                                                                                                                                                                                                                                                                                                                                                                                                                                                                                                                                                                                                                                                                                                                                                                                                                                                                                                                                                                                                                                                                                                                                                                                                                                                                                                                                                                                                                                                                                                                                                                                                                                                                                                                                                                                                                                                                                                                                                                                                                                                                                                                                                                                                                                                                                                                                                                                                                                                                                                                                                                                                                                                                                                                                                                                                                                                                                                                                                                                                                                                                                                                                                                                                                                                                                                                                                                                                                                                                                                                                                                                                                                                                                                                                                                                                                                                                                                                                                                                                                                                                                                                                                                                                                                                                                                                                                                                                                                                                                                                                                                                                                                                                                                                                                                                                 | 2020 | Free   | <a href="https://www.ncbi.nlm.nih.gov/pmc/articles/PMC7885494/">https://www.ncbi.nlm.nih.gov/pmc/articles/PMC7885494/</a> | "SARS-CoV-2", "Neurodegeneration", "Parkinson"                                                    | 14                                             |                               |
| Impact of COVID-19 Pandemic on Patients With Neurodegenerative Diseases.                                                                                                                                                                                           | Chao Hu, Cao Chen, Xiao-Ping Dong                                                                                                                                                                                                                                                                                                                                                                                                                                                                                                                                                                                                                                                                                                                                                                                                                                                                                                                                                                                                                                                                                                                                                                                                                                                                                                                                                                                                                                                                                                                                                                                                                                                                                                                                                                                                                                                                                                                                                                                                                                                                                                                                                                                                                                                                                                                                                                                                                                                                                                                                                                                                                                                                                                                                                                                                                                                                                                                                                                                                                                                                                                                                                                                                                                                                                                                                                                                                                                                                                                                                                                                                                                                                                                                                                                                                                                                                                                                                                                                                                                                                                                                                                                                                                                                                                                                                                                                                                                                                                                                                                                                                                                                                                                                                                                                                                                                                                 | 2020 | Free   | <a href="https://www.ncbi.nlm.nih.gov/pmc/articles/PMC7885494/">https://www.ncbi.nlm.nih.gov/pmc/articles/PMC7885494/</a> | "SARS-CoV-2", "Neurodegeneration", "Parkinson"                                                    | 7                                              |                               |
| Parkinson's Disease and post-COVID-19 Syndrome: The Parkinson's Long COVID Story.                                                                                                                                                                                  | Valentina Lita, Mayella Rodriguez-Violante, Arturo Abad                                                                                                                                                                                                                                                                                                                                                                                                                                                                                                                                                                                                                                                                                                                                                                                                                                                                                                                                                                                                                                                                                                                                                                                                                                                                                                                                                                                                                                                                                                                                                                                                                                                                                                                                                                                                                                                                                                                                                                                                                                                                                                                                                                                                                                                                                                                                                                                                                                                                                                                                                                                                                                                                                                                                                                                                                                                                                                                                                                                                                                                                                                                                                                                                                                                                                                                                                                                                                                                                                                                                                                                                                                                                                                                                                                                                                                                                                                                                                                                                                                                                                                                                                                                                                                                                                                                                                                                                                                                                                                                                                                                                                                                                                                                                                                                                                                                           | 2020 | Free   | <a href="https://www.ncbi.nlm.nih.gov/pmc/articles/PMC7885494/">https://www.ncbi.nlm.nih.gov/pmc/articles/PMC7885494/</a> | "SARS-CoV-2", "Neurodegeneration", "Parkinson"                                                    | 16                                             |                               |
| COVID-19 Associated Neurological Manifestations: An Emerging Electrophysiological Phenomenon.                                                                                                                                                                      | Geoffrey Velasco, Romanios Simionescu, Stefania Vidulescu                                                                                                                                                                                                                                                                                                                                                                                                                                                                                                                                                                                                                                                                                                                                                                                                                                                                                                                                                                                                                                                                                                                                                                                                                                                                                                                                                                                                                                                                                                                                                                                                                                                                                                                                                                                                                                                                                                                                                                                                                                                                                                                                                                                                                                                                                                                                                                                                                                                                                                                                                                                                                                                                                                                                                                                                                                                                                                                                                                                                                                                                                                                                                                                                                                                                                                                                                                                                                                                                                                                                                                                                                                                                                                                                                                                                                                                                                                                                                                                                                                                                                                                                                                                                                                                                                                                                                                                                                                                                                                                                                                                                                                                                                                                                                                                                                                                         | 2020 | Free   | <a href="https://www.ncbi.nlm.nih.gov/pmc/articles/PMC7885494/">https://www.ncbi.nlm.nih.gov/pmc/articles/PMC7885494/</a> | "SARS-CoV-2", "Neurodegeneration", "Parkinson"                                                    | 4                                              |                               |
| Clinical Profiles and Mortality of COVID-19 Inpatients with Parkinson's Disease in Guangzhou, China.                                                                                                                                                               | Rafaela Conces, Angel E. Nebreda, Daniel Herberich, Dirk                                                                                                                                                                                                                                                                                                                                                                                                                                                                                                                                                                                                                                                                                                                                                                                                                                                                                                                                                                                                                                                                                                                                                                                                                                                                                                                                                                                                                                                                                                                                                                                                                                                                                                                                                                                                                                                                                                                                                                                                                                                                                                                                                                                                                                                                                                                                                                                                                                                                                                                                                                                                                                                                                                                                                                                                                                                                                                                                                                                                                                                                                                                                                                                                                                                                                                                                                                                                                                                                                                                                                                                                                                                                                                                                                                                                                                                                                                                                                                                                                                                                                                                                                                                                                                                                                                                                                                                                                                                                                                                                                                                                                                                                                                                                                                                                                                                          | 2020 | Free   | <a href="https://www.ncbi.nlm.nih.gov/pmc/articles/PMC7885494/">https://www.ncbi.nlm.nih.gov/pmc/articles/PMC7885494/</a> | "SARS-CoV-2", "Neurodegeneration", "Parkinson"                                                    | 10                                             |                               |
| Direct and indirect neurological, cognitive, and behavioral effects of COVID-19 in the                                                                                                                                                                             | Francesco Iodice, Elena Haeck, Katerina, Paolo M. Rossini                                                                                                                                                                                                                                                                                                                                                                                                                                                                                                                                                                                                                                                                                                                                                                                                                                                                                                                                                                                                                                                                                                                                                                                                                                                                                                                                                                                                                                                                                                                                                                                                                                                                                                                                                                                                                                                                                                                                                                                                                                                                                                                                                                                                                                                                                                                                                                                                                                                                                                                                                                                                                                                                                                                                                                                                                                                                                                                                                                                                                                                                                                                                                                                                                                                                                                                                                                                                                                                                                                                                                                                                                                                                                                                                                                                                                                                                                                                                                                                                                                                                                                                                                                                                                                                                                                                                                                                                                                                                                                                                                                                                                                                                                                                                                                                                                                                         | 2020 | Free   | <a href="https://www.ncbi.nlm.nih.gov/pmc/articles/PMC7885494/">https://www.ncbi.nlm.nih.gov/pmc/articles/PMC7885494/</a> | "SARS-CoV-2", "Neurodegeneration", "Parkinson"                                                    | 61                                             |                               |
| Engineering organoids                                                                                                                                                                                                                                              | Paula Hefner, Michael Schramm                                                                                                                                                                                                                                                                                                                                                                                                                                                                                                                                                                                                                                                                                                                                                                                                                                                                                                                                                                                                                                                                                                                                                                                                                                                                                                                                                                                                                                                                                                                                                                                                                                                                                                                                                                                                                                                                                                                                                                                                                                                                                                                                                                                                                                                                                                                                                                                                                                                                                                                                                                                                                                                                                                                                                                                                                                                                                                                                                                                                                                                                                                                                                                                                                                                                                                                                                                                                                                                                                                                                                                                                                                                                                                                                                                                                                                                                                                                                                                                                                                                                                                                                                                                                                                                                                                                                                                                                                                                                                                                                                                                                                                                                                                                                                                                                                                                                                     | 2020 | Free   | <a href="https://www.ncbi.nlm.nih.gov/pmc/articles/PMC7885494/">https://www.ncbi.nlm.nih.gov/pmc/articles/PMC7885494/</a> | "SARS-CoV-2", "Neurodegeneration", "Parkinson"                                                    | 77                                             |                               |
| The Impact of Parkinson's Disease on manifestations and outcomes of Covid-19 pat                                                                                                                                                                                   | Amr Elshorbagy, Sherif Ghazy, Abdullah Reha, Al                                                                                                                                                                                                                                                                                                                                                                                                                                                                                                                                                                                                                                                                                                                                                                                                                                                                                                                                                                                                                                                                                                                                                                                                                                                                                                                                                                                                                                                                                                                                                                                                                                                                                                                                                                                                                                                                                                                                                                                                                                                                                                                                                                                                                                                                                                                                                                                                                                                                                                                                                                                                                                                                                                                                                                                                                                                                                                                                                                                                                                                                                                                                                                                                                                                                                                                                                                                                                                                                                                                                                                                                                                                                                                                                                                                                                                                                                                                                                                                                                                                                                                                                                                                                                                                                                                                                                                                                                                                                                                                                                                                                                                                                                                                                                                                                                                                                   | 2020 | Free   | <a href="https://www.ncbi.nlm.nih.gov/pmc/articles/PMC7885494/">https://www.ncbi.nlm.nih.gov/pmc/articles/PMC7885494/</a> | "SARS-CoV-2", "Neurodegeneration", "Parkinson"                                                    | 77                                             |                               |
| Antibodies in neurological disease                                                                                                                                                                                                                                 | Harald Probst                                                                                                                                                                                                                                                                                                                                                                                                                                                                                                                                                                                                                                                                                                                                                                                                                                                                                                                                                                                                                                                                                                                                                                                                                                                                                                                                                                                                                                                                                                                                                                                                                                                                                                                                                                                                                                                                                                                                                                                                                                                                                                                                                                                                                                                                                                                                                                                                                                                                                                                                                                                                                                                                                                                                                                                                                                                                                                                                                                                                                                                                                                                                                                                                                                                                                                                                                                                                                                                                                                                                                                                                                                                                                                                                                                                                                                                                                                                                                                                                                                                                                                                                                                                                                                                                                                                                                                                                                                                                                                                                                                                                                                                                                                                                                                                                                                                                                                     | 2020 | Free   | <a href="https://www.ncbi.nlm.nih.gov/pmc/articles/PMC7885494/">https://www.ncbi.nlm.nih.gov/pmc/articles/PMC7885494/</a> | "SARS-CoV-2", "Neurodegeneration", "Parkinson"                                                    | 16                                             |                               |
| Toward Understanding the Molecular Role of SNX27/Retromer in Human Health and                                                                                                                                                                                      | Minlu Chandra, Angel K. Kendall, Lauren P. Jackson                                                                                                                                                                                                                                                                                                                                                                                                                                                                                                                                                                                                                                                                                                                                                                                                                                                                                                                                                                                                                                                                                                                                                                                                                                                                                                                                                                                                                                                                                                                                                                                                                                                                                                                                                                                                                                                                                                                                                                                                                                                                                                                                                                                                                                                                                                                                                                                                                                                                                                                                                                                                                                                                                                                                                                                                                                                                                                                                                                                                                                                                                                                                                                                                                                                                                                                                                                                                                                                                                                                                                                                                                                                                                                                                                                                                                                                                                                                                                                                                                                                                                                                                                                                                                                                                                                                                                                                                                                                                                                                                                                                                                                                                                                                                                                                                                                                                | 2020 | Free   | <a href="https://www.ncbi.nlm.nih.gov/pmc/articles/PMC7885494/">https://www.ncbi.nlm.nih.gov/pmc/articles/PMC7885494/</a> | "SARS-CoV-2", "Neurodegeneration", "Parkinson"                                                    | 4                                              |                               |
| Dementia is an age-independent risk factor for severity and death in COVID-19 Inpat                                                                                                                                                                                | Anna C. Tullio, Sergio Vercellotti-Almeida, Sergio T. Ferre                                                                                                                                                                                                                                                                                                                                                                                                                                                                                                                                                                                                                                                                                                                                                                                                                                                                                                                                                                                                                                                                                                                                                                                                                                                                                                                                                                                                                                                                                                                                                                                                                                                                                                                                                                                                                                                                                                                                                                                                                                                                                                                                                                                                                                                                                                                                                                                                                                                                                                                                                                                                                                                                                                                                                                                                                                                                                                                                                                                                                                                                                                                                                                                                                                                                                                                                                                                                                                                                                                                                                                                                                                                                                                                                                                                                                                                                                                                                                                                                                                                                                                                                                                                                                                                                                                                                                                                                                                                                                                                                                                                                                                                                                                                                                                                                                                                       | 2020 | Free   | <a href="https://www.ncbi.nlm.nih.gov/pmc/articles/PMC7885494/">https://www.ncbi.nlm.nih.gov/pmc/articles/PMC7885494/</a> | "SARS-CoV-2", "Neurodegeneration", "Parkinson"                                                    | 7                                              |                               |
| Viral Infection and the Role of Mitochondria in Neurodegeneration.                                                                                                                                                                                                 | Agapi Arvaniti, Elia Mavrouli, Maria K. Katsi, Vasiliki                                                                                                                                                                                                                                                                                                                                                                                                                                                                                                                                                                                                                                                                                                                                                                                                                                                                                                                                                                                                                                                                                                                                                                                                                                                                                                                                                                                                                                                                                                                                                                                                                                                                                                                                                                                                                                                                                                                                                                                                                                                                                                                                                                                                                                                                                                                                                                                                                                                                                                                                                                                                                                                                                                                                                                                                                                                                                                                                                                                                                                                                                                                                                                                                                                                                                                                                                                                                                                                                                                                                                                                                                                                                                                                                                                                                                                                                                                                                                                                                                                                                                                                                                                                                                                                                                                                                                                                                                                                                                                                                                                                                                                                                                                                                                                                                                                                           | 2020 | Free   | <a href="https://www.ncbi.nlm.nih.gov/pmc/articles/PMC7885494/">https://www.ncbi.nlm.nih.gov/pmc/articles/PMC7885494/</a> | "SARS-CoV-2", "Neurodegeneration", "Parkinson"                                                    | 14                                             |                               |
| Telehealth in Neurodegenerative Diseases: Opportunities and Challenges for Parkin                                                                                                                                                                                  | Fabiola de Mello, Elina Novotny, Julia Magistrelli, Rose                                                                                                                                                                                                                                                                                                                                                                                                                                                                                                                                                                                                                                                                                                                                                                                                                                                                                                                                                                                                                                                                                                                                                                                                                                                                                                                                                                                                                                                                                                                                                                                                                                                                                                                                                                                                                                                                                                                                                                                                                                                                                                                                                                                                                                                                                                                                                                                                                                                                                                                                                                                                                                                                                                                                                                                                                                                                                                                                                                                                                                                                                                                                                                                                                                                                                                                                                                                                                                                                                                                                                                                                                                                                                                                                                                                                                                                                                                                                                                                                                                                                                                                                                                                                                                                                                                                                                                                                                                                                                                                                                                                                                                                                                                                                                                                                                                                          | 2020 | Free   | <a href="https://www.ncbi.nlm.nih.gov/pmc/articles/PMC7885494/">https://www.ncbi.nlm.nih.gov/pmc/articles/PMC7885494/</a> | "SARS-CoV-2", "Neurodegeneration", "Parkinson"                                                    | 7                                              |                               |
| Infection and Risk of Parkinson's Disease.                                                                                                                                                                                                                         | Richard J. Smythe, Alastair J. Convey, Malcolm Byrne, R                                                                                                                                                                                                                                                                                                                                                                                                                                                                                                                                                                                                                                                                                                                                                                                                                                                                                                                                                                                                                                                                                                                                                                                                                                                                                                                                                                                                                                                                                                                                                                                                                                                                                                                                                                                                                                                                                                                                                                                                                                                                                                                                                                                                                                                                                                                                                                                                                                                                                                                                                                                                                                                                                                                                                                                                                                                                                                                                                                                                                                                                                                                                                                                                                                                                                                                                                                                                                                                                                                                                                                                                                                                                                                                                                                                                                                                                                                                                                                                                                                                                                                                                                                                                                                                                                                                                                                                                                                                                                                                                                                                                                                                                                                                                                                                                                                                           | 2020 | Free   | <a href="https://www.ncbi.nlm.nih.gov/pmc/articles/PMC7885494/">https://www.ncbi.nlm.nih.gov/pmc/articles/PMC7885494/</a> | "SARS-CoV-2", "Neurodegeneration", "Parkinson"                                                    | 6                                              |                               |
| Brain Alpha-Synuclein and Neuroinflammation: A Review of the Literature.                                                                                                                                                                                           | Brayden A. Chiu, Yuxi                                                                                                                                                                                                                                                                                                                                                                                                                                                                                                                                                                                                                                                                                                                                                                                                                                                                                                                                                                                                                                                                                                                                                                                                                                                                                                                                                                                                                                                                                                                                                                                                                                                                                                                                                                                                                                                                                                                                                                                                                                                                                                                                                                                                                                                                                                                                                                                                                                                                                                                                                                                                                                                                                                                                                                                                                                                                                                                                                                                                                                                                                                                                                                                                                                                                                                                                                                                                                                                                                                                                                                                                                                                                                                                                                                                                                                                                                                                                                                                                                                                                                                                                                                                                                                                                                                                                                                                                                                                                                                                                                                                                                                                                                                                                                                                                                                                                                             | 2020 | Free   | <a href="https://www.ncbi.nlm.nih.gov/pmc/articles/PMC7885494/">https://www.ncbi.nlm.nih.gov/pmc/articles/PMC7885494/</a> | "SARS-CoV-2", "Neurodegeneration", "Parkinson"                                                    | 16                                             |                               |
| Clinic Polyphens in Brain Health and Disease: Current Perspectives.                                                                                                                                                                                                | Matthew G. Pontiff, Mohammad M. A. H. Malik, Emma                                                                                                                                                                                                                                                                                                                                                                                                                                                                                                                                                                                                                                                                                                                                                                                                                                                                                                                                                                                                                                                                                                                                                                                                                                                                                                                                                                                                                                                                                                                                                                                                                                                                                                                                                                                                                                                                                                                                                                                                                                                                                                                                                                                                                                                                                                                                                                                                                                                                                                                                                                                                                                                                                                                                                                                                                                                                                                                                                                                                                                                                                                                                                                                                                                                                                                                                                                                                                                                                                                                                                                                                                                                                                                                                                                                                                                                                                                                                                                                                                                                                                                                                                                                                                                                                                                                                                                                                                                                                                                                                                                                                                                                                                                                                                                                                                                                                 | 2020 | Free   | <a href="https://www.ncbi.nlm.nih.gov/pmc/articles/PMC7885494/">https://www.ncbi.nlm.nih.gov/pmc/articles/PMC7885494/</a> | "SARS-CoV-2", "Neurodegeneration", "Parkinson"                                                    | 6                                              |                               |
| Comprehensive annotation of the Chinese tree shrew genome by large-scale RNA se                                                                                                                                                                                    | Mao Sen, Ye, Yin-Yang, Zhang, Dan-Dan, Yu, Min Xu, Li                                                                                                                                                                                                                                                                                                                                                                                                                                                                                                                                                                                                                                                                                                                                                                                                                                                                                                                                                                                                                                                                                                                                                                                                                                                                                                                                                                                                                                                                                                                                                                                                                                                                                                                                                                                                                                                                                                                                                                                                                                                                                                                                                                                                                                                                                                                                                                                                                                                                                                                                                                                                                                                                                                                                                                                                                                                                                                                                                                                                                                                                                                                                                                                                                                                                                                                                                                                                                                                                                                                                                                                                                                                                                                                                                                                                                                                                                                                                                                                                                                                                                                                                                                                                                                                                                                                                                                                                                                                                                                                                                                                                                                                                                                                                                                                                                                                             | 2020 | Free   | <a href="https://www.ncbi.nlm.nih.gov/pmc/articles/PMC7885494/">https://www.ncbi.nlm.nih.gov/pmc/articles/PMC7885494/</a> | "SARS-CoV-2", "Neurodegeneration", "Parkinson"                                                    | 5                                              |                               |
| Extracellular Vesicles as Biomarkers and Therapeutic Tools: From Pre-Clinical to Clin                                                                                                                                                                              | Maria Chiara Cerretti, Rodolfo, Quotaro, Roberto Tanzi                                                                                                                                                                                                                                                                                                                                                                                                                                                                                                                                                                                                                                                                                                                                                                                                                                                                                                                                                                                                                                                                                                                                                                                                                                                                                                                                                                                                                                                                                                                                                                                                                                                                                                                                                                                                                                                                                                                                                                                                                                                                                                                                                                                                                                                                                                                                                                                                                                                                                                                                                                                                                                                                                                                                                                                                                                                                                                                                                                                                                                                                                                                                                                                                                                                                                                                                                                                                                                                                                                                                                                                                                                                                                                                                                                                                                                                                                                                                                                                                                                                                                                                                                                                                                                                                                                                                                                                                                                                                                                                                                                                                                                                                                                                                                                                                                                                            | 2020 | Free   | <a href="https://www.ncbi.nlm.nih.gov/pmc/articles/PMC7885494/">https://www.ncbi.nlm.nih.gov/pmc/articles/PMC7885494/</a> | "SARS-CoV-2", "Neurodegeneration", "Parkinson"                                                    | 7                                              |                               |
| Anticoagulants: Promising Products with Diverse Pharmacological Activities and Molec                                                                                                                                                                               | María Lluís Rodríguez, Zou, Xiong, Zhanqian Yang, Min                                                                                                                                                                                                                                                                                                                                                                                                                                                                                                                                                                                                                                                                                                                                                                                                                                                                                                                                                                                                                                                                                                                                                                                                                                                                                                                                                                                                                                                                                                                                                                                                                                                                                                                                                                                                                                                                                                                                                                                                                                                                                                                                                                                                                                                                                                                                                                                                                                                                                                                                                                                                                                                                                                                                                                                                                                                                                                                                                                                                                                                                                                                                                                                                                                                                                                                                                                                                                                                                                                                                                                                                                                                                                                                                                                                                                                                                                                                                                                                                                                                                                                                                                                                                                                                                                                                                                                                                                                                                                                                                                                                                                                                                                                                                                                                                                                                             | 2020 | Free   | <a href="https://www.ncbi.nlm.nih.gov/pmc/articles/PMC7885494/">https://www.ncbi.nlm.nih.gov/pmc/articles/PMC7885494/</a> | "SARS-CoV-2", "Neurodegeneration", "Parkinson"                                                    | 5                                              |                               |
| Neurological Complications of COVID-19: A Review of the Literature.                                                                                                                                                                                                | Kathryn Liu, Robert W. Taylor, Long Wang, Wang, Wang                                                                                                                                                                                                                                                                                                                                                                                                                                                                                                                                                                                                                                                                                                                                                                                                                                                                                                                                                                                                                                                                                                                                                                                                                                                                                                                                                                                                                                                                                                                                                                                                                                                                                                                                                                                                                                                                                                                                                                                                                                                                                                                                                                                                                                                                                                                                                                                                                                                                                                                                                                                                                                                                                                                                                                                                                                                                                                                                                                                                                                                                                                                                                                                                                                                                                                                                                                                                                                                                                                                                                                                                                                                                                                                                                                                                                                                                                                                                                                                                                                                                                                                                                                                                                                                                                                                                                                                                                                                                                                                                                                                                                                                                                                                                                                                                                                                              | 2020 | Free   | <a href="https://www.ncbi.nlm.nih.gov/pmc/articles/PMC7885494/">https://www.ncbi.nlm.nih.gov/pmc/articles/PMC7885494/</a> | "SARS-CoV-2", "Neurodegeneration", "Parkinson"                                                    | 7                                              |                               |
| Cannabidiol (CBD) as a Natural Drug Meeting the Criteria of a Multitarget Approach                                                                                                                                                                                 | Anna Stailonaki, Anna Tomalia, Irena Podolaj, Julija C                                                                                                                                                                                                                                                                                                                                                                                                                                                                                                                                                                                                                                                                                                                                                                                                                                                                                                                                                                                                                                                                                                                                                                                                                                                                                                                                                                                                                                                                                                                                                                                                                                                                                                                                                                                                                                                                                                                                                                                                                                                                                                                                                                                                                                                                                                                                                                                                                                                                                                                                                                                                                                                                                                                                                                                                                                                                                                                                                                                                                                                                                                                                                                                                                                                                                                                                                                                                                                                                                                                                                                                                                                                                                                                                                                                                                                                                                                                                                                                                                                                                                                                                                                                                                                                                                                                                                                                                                                                                                                                                                                                                                                                                                                                                                                                                                                                            | 2020 | Free   | <a href="https://www.ncbi.nlm.nih.gov/pmc/articles/PMC7885494/">https://www.ncbi.nlm.nih.gov/pmc/articles/PMC7885494/</a> | "SARS-CoV-2", "Neurodegeneration", "Parkinson"                                                    | 19                                             |                               |
| Amantadine: reappraisal of the timeless diamond—target updates and novel therape                                                                                                                                                                                   | Wojciech Danysz, Andrzej Dekundy, Andrzej Scheschnicki                                                                                                                                                                                                                                                                                                                                                                                                                                                                                                                                                                                                                                                                                                                                                                                                                                                                                                                                                                                                                                                                                                                                                                                                                                                                                                                                                                                                                                                                                                                                                                                                                                                                                                                                                                                                                                                                                                                                                                                                                                                                                                                                                                                                                                                                                                                                                                                                                                                                                                                                                                                                                                                                                                                                                                                                                                                                                                                                                                                                                                                                                                                                                                                                                                                                                                                                                                                                                                                                                                                                                                                                                                                                                                                                                                                                                                                                                                                                                                                                                                                                                                                                                                                                                                                                                                                                                                                                                                                                                                                                                                                                                                                                                                                                                                                                                                                            | 2020 | Free   | <a href="https://www.ncbi.nlm.nih.gov/pmc/articles/PMC7885494/">https://www.ncbi.nlm.nih.gov/pmc/articles/PMC7885494/</a> | "SARS-CoV-2", "Neurodegeneration", "Parkinson"                                                    | 7                                              |                               |
| Alzheimer's recognition and neuroprotective                                                                                                                                                                                                                        | Mindy Balbo, Carlos Argüero, Nicholas T. Nguyen                                                                                                                                                                                                                                                                                                                                                                                                                                                                                                                                                                                                                                                                                                                                                                                                                                                                                                                                                                                                                                                                                                                                                                                                                                                                                                                                                                                                                                                                                                                                                                                                                                                                                                                                                                                                                                                                                                                                                                                                                                                                                                                                                                                                                                                                                                                                                                                                                                                                                                                                                                                                                                                                                                                                                                                                                                                                                                                                                                                                                                                                                                                                                                                                                                                                                                                                                                                                                                                                                                                                                                                                                                                                                                                                                                                                                                                                                                                                                                                                                                                                                                                                                                                                                                                                                                                                                                                                                                                                                                                                                                                                                                                                                                                                                                                                                                                                   | 2020 | Free   | <a href="https://www.ncbi.nlm.nih.gov/pmc/articles/PMC7885494/">https://www.ncbi.nlm.nih.gov/pmc/articles/PMC7885494/</a> | "SARS-CoV-2", "Neurodegeneration", "Parkinson"                                                    | 13                                             |                               |
| Alzheimer's Disease and the Role of a Galaxy of Interleukin Signaling: Basic to                                                                                                                                                                                    | Shikhar Choudhary, Frank J. Long, Long Wang, Wang                                                                                                                                                                                                                                                                                                                                                                                                                                                                                                                                                                                                                                                                                                                                                                                                                                                                                                                                                                                                                                                                                                                                                                                                                                                                                                                                                                                                                                                                                                                                                                                                                                                                                                                                                                                                                                                                                                                                                                                                                                                                                                                                                                                                                                                                                                                                                                                                                                                                                                                                                                                                                                                                                                                                                                                                                                                                                                                                                                                                                                                                                                                                                                                                                                                                                                                                                                                                                                                                                                                                                                                                                                                                                                                                                                                                                                                                                                                                                                                                                                                                                                                                                                                                                                                                                                                                                                                                                                                                                                                                                                                                                                                                                                                                                                                                                                                                 | 2020 | Free   | <a href="https://www.ncbi.nlm.nih.gov/pmc/articles/PMC7885494/">https://www.ncbi.nlm.nih.gov/pmc/articles/PMC7885494/</a> | "SARS-CoV-2", "Neurodegeneration", "Parkinson"                                                    | 13                                             |                               |
| Lithium and Therapeutic Targeting of GSK-3                                                                                                                                                                                                                         | Melinda E. Smitow, Ralph L. Bhanu, Peter S. Klein                                                                                                                                                                                                                                                                                                                                                                                                                                                                                                                                                                                                                                                                                                                                                                                                                                                                                                                                                                                                                                                                                                                                                                                                                                                                                                                                                                                                                                                                                                                                                                                                                                                                                                                                                                                                                                                                                                                                                                                                                                                                                                                                                                                                                                                                                                                                                                                                                                                                                                                                                                                                                                                                                                                                                                                                                                                                                                                                                                                                                                                                                                                                                                                                                                                                                                                                                                                                                                                                                                                                                                                                                                                                                                                                                                                                                                                                                                                                                                                                                                                                                                                                                                                                                                                                                                                                                                                                                                                                                                                                                                                                                                                                                                                                                                                                                                                                 | 2020 | Free   | <a href="https://www.ncbi.nlm.nih.gov/pmc/articles/PMC7885494/">https://www.ncbi.nlm.nih.gov/pmc/articles/PMC7885494/</a> | "SARS-CoV-2", "Neurodegeneration", "Parkinson"                                                    | 7                                              |                               |
| Therapeutic Targeting of the Complement System from Rare Diseases to Pandemics                                                                                                                                                                                     | Peter Garred, Anders J. Tegner, Tom E. Molloy                                                                                                                                                                                                                                                                                                                                                                                                                                                                                                                                                                                                                                                                                                                                                                                                                                                                                                                                                                                                                                                                                                                                                                                                                                                                                                                                                                                                                                                                                                                                                                                                                                                                                                                                                                                                                                                                                                                                                                                                                                                                                                                                                                                                                                                                                                                                                                                                                                                                                                                                                                                                                                                                                                                                                                                                                                                                                                                                                                                                                                                                                                                                                                                                                                                                                                                                                                                                                                                                                                                                                                                                                                                                                                                                                                                                                                                                                                                                                                                                                                                                                                                                                                                                                                                                                                                                                                                                                                                                                                                                                                                                                                                                                                                                                                                                                                                                     | 2020 | Free   | <a href="https://www.ncbi.nlm.nih.gov/pmc/articles/PMC7885494/">https://www.ncbi.nlm.nih.gov/pmc/articles/PMC7885494/</a> | "SARS-CoV-2", "Neurodegeneration", "Parkinson"                                                    | 18                                             |                               |
| Neurodegeneration as a Natural Process: A Review of the Literature.                                                                                                                                                                                                | Natasha Nene, Diksha Singh, Dattin R. Morales, John A                                                                                                                                                                                                                                                                                                                                                                                                                                                                                                                                                                                                                                                                                                                                                                                                                                                                                                                                                                                                                                                                                                                                                                                                                                                                                                                                                                                                                                                                                                                                                                                                                                                                                                                                                                                                                                                                                                                                                                                                                                                                                                                                                                                                                                                                                                                                                                                                                                                                                                                                                                                                                                                                                                                                                                                                                                                                                                                                                                                                                                                                                                                                                                                                                                                                                                                                                                                                                                                                                                                                                                                                                                                                                                                                                                                                                                                                                                                                                                                                                                                                                                                                                                                                                                                                                                                                                                                                                                                                                                                                                                                                                                                                                                                                                                                                                                                             | 2020 | Free   | <a href="https://www.ncbi.nlm.nih.gov/pmc/articles/PMC7885494/">https://www.ncbi.nlm.nih.gov/pmc/articles/PMC7885494/</a> | "SARS-CoV-2", "Neurodegeneration", "Parkinson"                                                    | 42                                             |                               |
| Architecture and mechanism of the SARS-CoV-2 spike assembly                                                                                                                                                                                                        | Natasha Nene, Diksha Singh, Dattin R. Morales, John A                                                                                                                                                                                                                                                                                                                                                                                                                                                                                                                                                                                                                                                                                                                                                                                                                                                                                                                                                                                                                                                                                                                                                                                                                                                                                                                                                                                                                                                                                                                                                                                                                                                                                                                                                                                                                                                                                                                                                                                                                                                                                                                                                                                                                                                                                                                                                                                                                                                                                                                                                                                                                                                                                                                                                                                                                                                                                                                                                                                                                                                                                                                                                                                                                                                                                                                                                                                                                                                                                                                                                                                                                                                                                                                                                                                                                                                                                                                                                                                                                                                                                                                                                                                                                                                                                                                                                                                                                                                                                                                                                                                                                                                                                                                                                                                                                                                             | 2020 | Free   | <a href="https://www.ncbi.nlm.nih.gov/pmc/articles/PMC7885494/">https://www.ncbi.nlm.nih.gov/pmc/articles/PMC7885494/</a> | "SARS-CoV-2", "Neurodegeneration", "Parkinson"                                                    | 4                                              |                               |
| Virtual Reality as a Technological Aid Solution to Support Communication in Persons With                                                                                                                                                                           | Fabrizio Stasolla, Maria Matamala-Gomez, Sara Bernini, Ale                                                                                                                                                                                                                                                                                                                                                                                                                                                                                                                                                                                                                                                                                                                                                                                                                                                                                                                                                                                                                                                                                                                                                                                                                                                                                                                                                                                                                                                                                                                                                                                                                                                                                                                                                                                                                                                                                                                                                                                                                                                                                                                                                                                                                                                                                                                                                                                                                                                                                                                                                                                                                                                                                                                                                                                                                                                                                                                                                                                                                                                                                                                                                                                                                                                                                                                                                                                                                                                                                                                                                                                                                                                                                                                                                                                                                                                                                                                                                                                                                                                                                                                                                                                                                                                                                                                                                                                                                                                                                                                                                                                                                                                                                                                                                                                                                                                        | 2020 | Free   | <a href="https://www.ncbi.nlm.nih.gov/pmc/articles/PMC7885494/">https://www.ncbi.nlm.nih.gov/pmc/articles/PMC7885494/</a> | "SARS-CoV-2", "Neurodegeneration", "Parkinson"                                                    | 8                                              |                               |
| Alzheimer's: an expanding therapeutic pipeline for a complex disease                                                                                                                                                                                               | Thomas Bieber                                                                                                                                                                                                                                                                                                                                                                                                                                                                                                                                                                                                                                                                                                                                                                                                                                                                                                                                                                                                                                                                                                                                                                                                                                                                                                                                                                                                                                                                                                                                                                                                                                                                                                                                                                                                                                                                                                                                                                                                                                                                                                                                                                                                                                                                                                                                                                                                                                                                                                                                                                                                                                                                                                                                                                                                                                                                                                                                                                                                                                                                                                                                                                                                                                                                                                                                                                                                                                                                                                                                                                                                                                                                                                                                                                                                                                                                                                                                                                                                                                                                                                                                                                                                                                                                                                                                                                                                                                                                                                                                                                                                                                                                                                                                                                                                                                                                                                     | 2020 | Free   | <a href="https://www.ncbi.nlm.nih.gov/pmc/articles/PMC7885494/">https://www.ncbi.nlm.nih.gov/pmc/articles/PMC7885494/</a> | "SARS-CoV-2", "Neurodegeneration", "Parkinson"                                                    | 6                                              |                               |
| Relevance of Proinflammatory Activated Receptors in Multistage Parkinson's Disease                                                                                                                                                                                 | María José Rodríguez, Sara Carro-Arias, Rafaela Lago, Jacov                                                                                                                                                                                                                                                                                                                                                                                                                                                                                                                                                                                                                                                                                                                                                                                                                                                                                                                                                                                                                                                                                                                                                                                                                                                                                                                                                                                                                                                                                                                                                                                                                                                                                                                                                                                                                                                                                                                                                                                                                                                                                                                                                                                                                                                                                                                                                                                                                                                                                                                                                                                                                                                                                                                                                                                                                                                                                                                                                                                                                                                                                                                                                                                                                                                                                                                                                                                                                                                                                                                                                                                                                                                                                                                                                                                                                                                                                                                                                                                                                                                                                                                                                                                                                                                                                                                                                                                                                                                                                                                                                                                                                                                                                                                                                                                                                                                       | 2020 | Free   | <a href="https://www.ncbi.nlm.nih.gov/pmc/articles/PMC7885494/">https://www.ncbi.nlm.nih.gov/pmc/articles/PMC7885494/</a> | "SARS-CoV-2", "Neurodegeneration", "Parkinson"                                                    | 6                                              |                               |
| Alzheimer's Disease and the Role of Mitochondria: A Review of the Literature.                                                                                                                                                                                      | Mahmoud Saki                                                                                                                                                                                                                                                                                                                                                                                                                                                                                                                                                                                                                                                                                                                                                                                                                                                                                                                                                                                                                                                                                                                                                                                                                                                                                                                                                                                                                                                                                                                                                                                                                                                                                                                                                                                                                                                                                                                                                                                                                                                                                                                                                                                                                                                                                                                                                                                                                                                                                                                                                                                                                                                                                                                                                                                                                                                                                                                                                                                                                                                                                                                                                                                                                                                                                                                                                                                                                                                                                                                                                                                                                                                                                                                                                                                                                                                                                                                                                                                                                                                                                                                                                                                                                                                                                                                                                                                                                                                                                                                                                                                                                                                                                                                                                                                                                                                                                                      | 2020 | Free   | <a href="https://www.ncbi.nlm.nih.gov/pmc/articles/PMC7885494/">https://www.ncbi.nlm.nih.gov/pmc/articles/PMC7885494/</a> | "SARS-CoV-2", "Neurodegeneration", "Parkinson"                                                    | 6                                              |                               |
| How COVID-19 will boost remote exercise-based treatment in Parkinson's disease: a narra                                                                                                                                                                            | Agnes Lager, Lucia Gassner, Anna Rott, Sebastian Hansen                                                                                                                                                                                                                                                                                                                                                                                                                                                                                                                                                                                                                                                                                                                                                                                                                                                                                                                                                                                                                                                                                                                                                                                                                                                                                                                                                                                                                                                                                                                                                                                                                                                                                                                                                                                                                                                                                                                                                                                                                                                                                                                                                                                                                                                                                                                                                                                                                                                                                                                                                                                                                                                                                                                                                                                                                                                                                                                                                                                                                                                                                                                                                                                                                                                                                                                                                                                                                                                                                                                                                                                                                                                                                                                                                                                                                                                                                                                                                                                                                                                                                                                                                                                                                                                                                                                                                                                                                                                                                                                                                                                                                                                                                                                                                                                                                                                           | 2020 | Free   | <a href="https://www.ncbi.nlm.nih.gov/pmc/articles/PMC7885494/">https://www.ncbi.nlm.nih.gov/pmc/articles/PMC7885494/</a> | "SARS-CoV-2", "Neurodegeneration", "Parkinson"                                                    | 11                                             |                               |
| AD/Alzheimers as Vaccine Adjuvants Targeting Cancer and Infectious Diseases                                                                                                                                                                                        | Marina Luchina, Sören Reinkens, Anita Bellic                                                                                                                                                                                                                                                                                                                                                                                                                                                                                                                                                                                                                                                                                                                                                                                                                                                                                                                                                                                                                                                                                                                                                                                                                                                                                                                                                                                                                                                                                                                                                                                                                                                                                                                                                                                                                                                                                                                                                                                                                                                                                                                                                                                                                                                                                                                                                                                                                                                                                                                                                                                                                                                                                                                                                                                                                                                                                                                                                                                                                                                                                                                                                                                                                                                                                                                                                                                                                                                                                                                                                                                                                                                                                                                                                                                                                                                                                                                                                                                                                                                                                                                                                                                                                                                                                                                                                                                                                                                                                                                                                                                                                                                                                                                                                                                                                                                                      | 2020 | Free   | <a href="https://www.ncbi.nlm.nih.gov/pmc/articles/PMC7885494/">https://www.ncbi.nlm.nih.gov/pmc/articles/PMC7885494/</a> | "SARS-CoV-2", "Neurodegeneration", "Parkinson"                                                    | 17                                             |                               |
| Advances in TPR chain delivery: from target validation to clinical studies                                                                                                                                                                                         | Ali-Pekka Korkko, Sanna A. Mäkelä, Rami Gaudet, Arto                                                                                                                                                                                                                                                                                                                                                                                                                                                                                                                                                                                                                                                                                                                                                                                                                                                                                                                                                                                                                                                                                                                                                                                                                                                                                                                                                                                                                                                                                                                                                                                                                                                                                                                                                                                                                                                                                                                                                                                                                                                                                                                                                                                                                                                                                                                                                                                                                                                                                                                                                                                                                                                                                                                                                                                                                                                                                                                                                                                                                                                                                                                                                                                                                                                                                                                                                                                                                                                                                                                                                                                                                                                                                                                                                                                                                                                                                                                                                                                                                                                                                                                                                                                                                                                                                                                                                                                                                                                                                                                                                                                                                                                                                                                                                                                                                                                              | 2020 | Free   | <a href="https://www.ncbi.nlm.nih.gov/pmc/articles/PMC7885494/">https://www.ncbi.nlm.nih.gov/pmc/articles/PMC7885494/</a> | "SARS-CoV-2", "Neurodegeneration", "Parkinson"                                                    | 4                                              |                               |
| Disease-Related Changes in the Gut Microbiome in Parkinson's Disease: A Review                                                                                                                                                                                     | G. R. S. |      |        |                                                                                                                           |                                                                                                   |                                                |                               |

## ClinicalTrials.gov Search Results 03/15/2022

|    | NCT Number  | Title                                                                                                                                                                                                                                       | Status                  | Study Results        | Conditions                                                                                                                                                                                                                                                                                                                  | Interventions                                                                                                                               | Characteristics                                                                                                   | Population            |
|----|-------------|---------------------------------------------------------------------------------------------------------------------------------------------------------------------------------------------------------------------------------------------|-------------------------|----------------------|-----------------------------------------------------------------------------------------------------------------------------------------------------------------------------------------------------------------------------------------------------------------------------------------------------------------------------|---------------------------------------------------------------------------------------------------------------------------------------------|-------------------------------------------------------------------------------------------------------------------|-----------------------|
| 1  | NCT04466839 | <a href="#">Evaluation of the Containment Impact Linked to the Covid-19 Pandemic in a Population of Parkinson Patients</a>                                                                                                                  | Completed               | No Results Available | <ul style="list-style-type: none"> <li>•Parkinson Disease</li> <li>•COVID</li> </ul>                                                                                                                                                                                                                                        | <ul style="list-style-type: none"> <li>•Other: Questionnaire and interview</li> </ul>                                                       | Study Type:<br>Observational                                                                                      | Enrollment:<br>411    |
| 2  | NCT04422353 | <a href="#">Video Dance Class and Unsupervised Physical Activity During Covid-19 Pandemic in People With Parkinson's Disease</a>                                                                                                            | Recruiting              | No Results Available | <ul style="list-style-type: none"> <li>•Parkinson Disease</li> <li>•Parkinson Disease 10</li> </ul>                                                                                                                                                                                                                         | <ul style="list-style-type: none"> <li>•Other: Video Dance classes</li> <li>•Other: Unsupervised physical activities</li> </ul>             | Study Type:<br>Interventional                                                                                     | Enrollment:<br>60     |
| 3  | NCT04565080 | <a href="#">Clinical Correlates of COVID-19 Pandemic in Patients With Functional Movement Disorder (FMD) and Parkinson's Disease (PD)</a>                                                                                                   | Completed               | No Results Available | <ul style="list-style-type: none"> <li>•Parkinson's Disease</li> <li>•Functional Movement Disorders</li> <li>•COVID-19</li> </ul>                                                                                                                                                                                           |                                                                                                                                             | Study Type:<br>Observational                                                                                      | Enrollment:<br>44     |
| 4  | NCT04798066 | <a href="#">HBPCOV01:"Intermediate Size Expanded Access Protocol for the Treatment of Post-COVID-19 Syndrome" HBPD05: "Intermediate Size Patient Population Expanded Access IND for the Treatment of Patients With Parkinson's Disease"</a> | Available               | No Results Available | <ul style="list-style-type: none"> <li>•Post COVID-19 Syndrome</li> <li>•Parkinson Disease</li> </ul>                                                                                                                                                                                                                       | <ul style="list-style-type: none"> <li>•Biological: HB-adMSCs</li> </ul>                                                                    | Study Type:<br>Expanded Access<br><ul style="list-style-type: none"> <li>•Intermediate-size Population</li> </ul> |                       |
| 5  | NCT04535297 | <a href="#">Consequences of the COVID-19 Lockdown on Health and Well-being of Patients With Parkinson Disease and Post-stroke</a>                                                                                                           | Completed               | No Results Available | <ul style="list-style-type: none"> <li>•Parkinson Disease</li> <li>•Stroke</li> </ul>                                                                                                                                                                                                                                       | <ul style="list-style-type: none"> <li>•Other: exposure</li> </ul>                                                                          | Study Type:<br>Observational                                                                                      | Enrollment:<br>198    |
| 6  | NCT04942392 | <a href="#">Digital Dance for People With Parkinson's Disease During the COVID-19 Pandemic</a>                                                                                                                                              | Completed               | No Results Available | <ul style="list-style-type: none"> <li>•Parkinson Disease</li> </ul>                                                                                                                                                                                                                                                        | <ul style="list-style-type: none"> <li>•Device: Digital dance for PD</li> </ul>                                                             | Study Type:<br>Interventional                                                                                     | Enrollment:<br>33     |
| 7  | NCT05074771 | <a href="#">At Home REhabilitation and Monitoring of People in poST-covid Condition Through ARc-inTellicare Platform (RESTART/RICOMINCIARE)</a>                                                                                             | Enrolling by invitation | No Results Available | <ul style="list-style-type: none"> <li>•Post-COVID19</li> <li>•Parkinson Disease</li> </ul>                                                                                                                                                                                                                                 | <ul style="list-style-type: none"> <li>•Device: ARC intellicare</li> </ul>                                                                  | Study Type:<br>Interventional                                                                                     | Enrollment:<br>20     |
| 8  | NCT04720118 | <a href="#">Parkinson's Disease and Experiences Throughout the COVID-19 Pandemic</a>                                                                                                                                                        | Recruiting              | No Results Available | <ul style="list-style-type: none"> <li>•Parkinson Disease</li> <li>•Covid19</li> <li>•Satisfaction, Patient</li> <li>•Quality of Life</li> </ul>                                                                                                                                                                            | <ul style="list-style-type: none"> <li>•Other: No Intervention</li> </ul>                                                                   | Study Type:<br>Observational                                                                                      | Enrollment:<br>150    |
| 9  | NCT04982887 | <a href="#">Tele-Rehabilitation in Parkinson's Disease</a>                                                                                                                                                                                  | Enrolling by invitation | No Results Available | <ul style="list-style-type: none"> <li>•Parkinson Disease</li> </ul>                                                                                                                                                                                                                                                        | <ul style="list-style-type: none"> <li>•Other: Exercise</li> </ul>                                                                          | Study Type:<br>Interventional                                                                                     | Enrollment:<br>12     |
| 10 | NCT04719468 | <a href="#">PD-Ballet: Effectiveness and Implementation in Parkinson's Disease</a>                                                                                                                                                          | Recruiting              | No Results Available | <ul style="list-style-type: none"> <li>•Parkinson Disease</li> </ul>                                                                                                                                                                                                                                                        | <ul style="list-style-type: none"> <li>•Other: Dance with ballet elements</li> </ul>                                                        | Study Type:<br>Interventional                                                                                     | Enrollment:<br>160    |
| 11 | NCT04963894 | <a href="#">Effects of Home Rehabilitation of Balance Based on Functional Exercises in People With Parkinson's Disease</a>                                                                                                                  | Recruiting              | No Results Available | <ul style="list-style-type: none"> <li>•Parkinson Disease</li> </ul>                                                                                                                                                                                                                                                        | <ul style="list-style-type: none"> <li>•Other: Home functional balance physiotherapy</li> <li>•Other: Conventional physiotherapy</li> </ul> | Study Type:<br>Interventional                                                                                     | Enrollment:<br>112    |
| 12 | NCT03944447 | <a href="#">Outcomes Mandate National Integration With Cannabis as Medicine for Prevention and Treatment of COVID-19</a>                                                                                                                    | Recruiting              | No Results Available | <ul style="list-style-type: none"> <li>•Chronic Pain</li> <li>•Chronic Pain Syndrome</li> <li>•Chronic Pain Due to Injury</li> <li>•Chronic Pain Due to Trauma</li> <li>•Fibromyalgia</li> <li>•Seizures</li> <li>•Hepatitis C</li> <li>•Cancer</li> <li>•Crohn Disease</li> <li>•HIV/AIDS</li> <li>•and 23 more</li> </ul> | <ul style="list-style-type: none"> <li>•Drug: Cannabis, Medical</li> <li>•Device: RYAH-Medtech Inhaler</li> </ul>                           | Study Type:<br>Interventional                                                                                     | Enrollment:<br>200000 |

|    | NCT Number  | Title                                                                                                                                                                                | Status                  | Study Results        | Conditions                                                                                                                                   | Interventions                                                                     | Characteristics               | Population          |
|----|-------------|--------------------------------------------------------------------------------------------------------------------------------------------------------------------------------------|-------------------------|----------------------|----------------------------------------------------------------------------------------------------------------------------------------------|-----------------------------------------------------------------------------------|-------------------------------|---------------------|
| 13 | NCT04644367 | <a href="#">Effects of a Biomechanical-based Tai Chi Program on Gait and Posture in People With Parkinson's Disease</a>                                                              | Active, not recruiting  | No Results Available | •Parkinson Disease                                                                                                                           | •Other: Tai Chi intervention<br>•Other: Regular Physical Activity (control) group | Study Type:<br>Interventional | Enrollment:<br>40   |
| 14 | NCT04833088 | <a href="#">Exploratory Study About the Implementation of Technology in the Rehabilitation</a>                                                                                       | Enrolling by invitation | No Results Available | •Stroke<br>•Parkinson Disease<br>•Covid19<br>•Neglect, Hemispatial                                                                           | •Other: Focus group discussions                                                   | Study Type:<br>Interventional | Enrollment:<br>100  |
| 15 | NCT04568707 | <a href="#">Evaluation of Biological Response to SARS-COV2 (COVID-19) in Patients With Pre-existing Neurological Disease or Newly Neurological Symptoms (BIO-COCO-NEUROSCIENCES)</a> | Recruiting              | No Results Available | •Covid19<br>•Neurologic Manifestations<br>•Psychiatric Manifestations                                                                        | •Other: blood sample                                                              | Study Type:<br>Interventional | Enrollment:<br>200  |
| 16 | NCT04782518 | <a href="#">Personalizing Exercise for Parkinson Disease</a>                                                                                                                         | Recruiting              | No Results Available | •Parkinson Disease                                                                                                                           |                                                                                   | Study Type:<br>Observational  | Enrollment:<br>1000 |
| 17 | NCT03797378 | <a href="#">Movement-2-Music: Lakeshore Examination of Activity, Disability, and Exercise Response Study</a>                                                                         | Recruiting              | No Results Available | •Spinal Cord Injuries<br>•Traumatic Brain Injury<br>•Spina Bifida<br>•Cerebral Palsy<br>•Stroke<br>•Parkinson Disease<br>•Multiple Sclerosis | •Other: eM2M                                                                      | Study Type:<br>Interventional | Enrollment:<br>108  |
